# Supplementary material for: Room-temperature synthesis of core–shell structured magnetic covalent organic frameworks for efficient enrichment of peptides and simultaneous exclusion of proteins
Source: Royal Society of Chemistry journal article supplement (doi:10.1039/c7cc00482f), 2017-01-01
Supplement: c7cc00482f1.pdf [file c7cc00482f1.pdf]

# Electronic Supplementary Information

## **Room-temperature synthesis of core-shell structured magnetic covalent organic frameworks for efficient enrichment of peptides and simultaneous exclusion of proteins**

Guo Lin,<sup>a</sup> Chaohong Gao,<sup>a</sup> Qiong Zheng,<sup>a</sup> Zhixian Lei,<sup>a</sup> Huijuan Geng,<sup>a</sup> Zian Lin,<sup>a\*</sup> Huanghao  
Yang,<sup>a</sup> and Zongwei Cai<sup>b\*</sup>

a) Ministry of Education Key Laboratory of Analysis and Detection for Food Safety, Fujian  
Provincial Key Laboratory of Analysis and Detection Technology for Food Safety, College of  
Chemistry, Fuzhou University, Fuzhou, Fujian, 350116, China

b) Partner State Key Laboratory of Environmental and Biological Analysis, Department of  
Chemistry, Hong Kong Baptist University, 224 Waterloo Road, Kowloon Tong, Hong Kong,  
SAR, P. R. China

● Corresponding author: Zian Lin; Zongwei Cai

● Postal address: College of Chemistry, Fuzhou University, Fuzhou, Fujian,  
350116, China

● Fax: 86-591-22866135

● E-mail: zianlin@fzu.edu.cn (Z.A. Lin); zwcai@hkbu.edu.hk (Z.W. Cai)

## 20 EXPERIMENTAL SECTION

### 21 1. Chemicals and reagents

22 All reagents above were of analytical grade or better. Ferric chloride hexahydrate ( $\text{FeCl}_3 \cdot 6\text{H}_2\text{O}$ ),  
23 sodium citrate dehydrate ( $\text{Na}_3\text{Cit} \cdot 2\text{H}_2\text{O}$ ), dimethyl sulfoxide, tetrahydrofuran, ethanol and methanol  
24 were obtained from Sinopharm Chemical Reagent, Co., Ltd (Shanghai, China). 1,3,5-Tris(4-  
25 aminophenyl)benzene (TAPB) was purchased from J&K Chemical Ltd (Shanghai, China).  
26 Trifluoroacetic acid (TFA), formic acid (FA), sodium acetate, ethylene glycol, trypsin (DPCC  
27 treated, from bovine pancreas), insulin, Lysozyme (Lyz) and terephthalaldicarboxaldehyde (TPA)  
28 were obtained from Aladdin Chemistry Co., Ltd (Shanghai, China). Bovine serum albumin (BSA)  
29 was purchased from Shanghai Lanji Co. Ltd. (Shanghai, China). Two peptides (Phe-Gly-Phe-Gly-  
30 Phe (Mw = 573.66, Sequence: FGFGF, Grand Average of Hydropathy (GRAVY) = 1.52), (Gly-  
31 Gly-Phe-Gly-Gly (Mw = 393.35, Sequence: GGFGG, Grand Average of Hydropathy (GRAVY) =  
32 0.24) were purchased from Guotai Bio-technology Co. Ltd. (Hefei, China). Healthy human serum  
33 was kindly donated by Fujian Provincial Official Hospital (Fuzhou, China). Deionized water (18.2  
34  $\text{M}\Omega \text{ cm}^{-1}$ ) was prepared with a Milli-Q water purification system (Millipore, USA).

### 35 2. Preparation of $\text{Fe}_3\text{O}_4$ magnetic nanoparticles

36 The magnetic nanoparticles (MNPs) were synthesized according to the previous work <sup>[1,2]</sup> with  
37 some modification. Briefly,  $\text{FeCl}_3 \cdot 6\text{H}_2\text{O}$  (8.1 g),  $\text{Na}_3\text{Cit} \cdot 2\text{H}_2\text{O}$  (1.5 g) and sodium acetate (12.0 g)  
38 were dissolved in ethylene glycol (200 mL), followed by stirring intensively. Then, the obtained  
39 homogeneous yellow solution was transferred to autoclave, and then heated up to 200 °C for 12 h.  
40 After reaction, the product was separated with a magnet and washed with water and ethanol for  
41 several times. Finally, the product was dried under vacuum at room temperature for further use.

### 42 3. Preparation of core-shell structured $\text{Fe}_3\text{O}_4@\text{COFs}$

43 The synthesis of core-shell structured  $\text{Fe}_3\text{O}_4@\text{COFs}$  was carried out as follow. In brief,  $\text{Fe}_3\text{O}_4$   
44 (0.15 g), 1,3,5-Tris(4-aminophenyl)benzene (0.106 g) and terephthalaldehyde (0.06 g)  
45 were dissolved in dimethyl sulfoxide (DMSO, 60 mL) and sonicated for 5 min. Subsequently,  
46 acetic acid (17.5 M, 2 mL) was slowly added with the assistance of sonication and the brown  
47 precipitates ( $\text{Fe}_3\text{O}_4@\text{COFs}$ ) were formed during this process ( $\sim 10$  min). After incubation for 30  
48 min, the yielded brown precipitate was collected with the help of magnet and then washed with  
49 anhydrous tetrahydrofuran, and anhydrous methanol for three times. Finally, the brown precipitate  
50 was dried under vacuum at room temperature prior to use.

#### 51 **4. Characterization**

52 Scanning electron microscopy (SEM) images were recorded by a FEI Emission Scanning  
53 Electron Microscope (SU8020, Hitachi, Japan). Transmission electron microscopy (TEM) images  
54 were obtained on a FEI Tecnai G20 (USA) at 200 kV. Nitrogen adsorption-desorption isotherms  
55 were tested using an ASAP 2020 (Micromeritics, USA). The samples were degassed in a vacuum at  
56 150 °C for 8 h before measurement. The surface area of the samples was reckoned using the  
57 Brunauer–Emmett–Teller (BET) equation. The total pore volume,  $V_T$ , was obtained using the  
58 desorption branch of the  $\text{N}_2$  isotherm at  $P/P_0 = 0.992$ . By using the Barrett-Joyner-Halenda (BJH)  
59 model, the pore volume and pore size distribution were derived from the adsorption branches of the  
60 isotherms. Fourier-transform infrared spectroscopy (FTIR) spectra were obtained by Nicolet 6700  
61 spectrometer (Thermo Fisher, USA) using KBr pellets. The crystal structure of the magnetic COFs  
62 was determined by X'Pert-Pro MPD (Philips, Holland). The magnetization curves were recorded by  
63 a superconducting quantum interference device magnetometer (SQUID) MPMS XL-7 (Quantum  
64 Design, USA) at 300 K. Thermogravimetric analysis (TGA) were performed using a Shimadzu

DTG-60AH in the temperature range 100 to 800 °C under flowing air (100 mL/min) with a heating rate of 10 °C/min.

HPLC analysis were measured out using a Shimadzu Prominence LC-20A HPLC (Kyoto, Japan) with an Agela Technologies Venusil XBP C8 (100 mm × 4.6 mm, 5 μm, 300 Å) column (Tianjin, China) and an GL Sciences Inc InertSustain C18 (150 mm × 4.6 mm, 5 μm) column (Japan). The separation of peptides, proteins and its mixture was performed by using mobile phase with various ratios under gradient mode: buffer A (0.1% TFA aqueous solution) and buffer B (0.08% TFA acetonitrile (ACN) solution); The flow rate was 1.0 mL/min; column temperature was 40 °C. The injected sample volume was 10 μL, and the samples were detected using a UV detector (214 nm). Quantitative analysis of the protein solutions were performed from a linear calibration curve of peak area versus concentration.

HPLC-Q-TOF MS was performed as follow. A 1260 series HPLC system with a binary SL pump was used. Detection was performed using an Agilent 6520 Q-TOF with dual electrospray ion source (ESI). The separation of all samples was performed on Agilent Poroshell 120 EC-C18 column (2.7 μm, 3.0 mm × 50 mm, Agilent). The flow rate was 0.3 mL/min. Solvent A was composed of water containing 0.1% formic acid. Solvent B was composed of ACN containing 0.1% formic acid. The following gradient program was used: 0–3 min, 3% B; 3–20 min, 3–40% B; 20–23 min, 40–80% B; 23–25 min, 80% B. A flush step was performed with 80 % B for 3 min and the column was equilibrated with 3 % B for 4 min. The column temperature was maintained at 40 °C. The sample injection volume was 10 μL. Nitrogen was used as drying gas at a temperature of 350 °C and a flow-rate of 10 L/min. Full scan MS data and MS/MS data were acquired at m/z 300–2000 and 100–3000, respectively. Scan rates for MS and MS/MS data were set to 3 spectra/s. The voltage set for the MS capillary was 4 kV and the fragmentor was set to 175 V. For MS2

88 experiments, the collision energy was set to according to formula, in which the top three highest  
89 intensity peaks in each MS were chosen for collision-induced dissociation. Isolation width for MS<sup>2</sup>  
90 was  $\pm 4$  amu.

91 All the LC-MS/MS raw data were searched with Spectrum Mill version A.03.03 software (Agilent  
92 Technologies). Trypsin restriction was set with two missed cleavages. Cys carboxymethylation was  
93 set as the static modification. The mass tolerances were 100 ppm for parent ions and 200 amu for  
94 fragment ions.

## 95 **5. In-vial adsorption and separation of peptides.**

96 The adsorption experiments were carried out in a centrifuge tube at room temperature. Milli-Q  
97 water were the solvent of all sample solutions.

98 In the isothermal adsorption experiments, 0.3 mg of Fe<sub>3</sub>O<sub>4</sub>@COFs was vortex-mixed with 0.3  
99 mL of FGFGF or GGFGG solutions at different concentrations for 20 min in the centrifuge tube.  
100 The nanocomposite-peptides conjugates were magnetically isolated by magnet. Then the  
101 supernatants were collected for HPLC analysis. The equilibrium adsorption capacity ( $Q_e$ , mg g<sup>-1</sup>)  
102 was calculated according to

$$103 \quad Q_e = \frac{(C_0 - C_e)}{m} V \quad (1)$$

104 The initial peptide concentration ( $\mu\text{g mL}^{-1}$ ) denoted as  $C_0$ , the supernatant peptide concentration  
105 ( $\mu\text{g mL}^{-1}$ ) denoted as  $C_e$ , the volume of protein solution (mL) denoted as  $V$  and the weight of the  
106 Fe<sub>3</sub>O<sub>4</sub>@COFs (g) denoted as  $m$ .

107 In the kinetic absorption experiment, 0.3 mg of Fe<sub>3</sub>O<sub>4</sub>@COF was incubated with 0.3 mL of  
108 FGFGF or GGFGG solution (each of peptide, 70  $\mu\text{g mL}^{-1}$ ) for different incubation times.

109 In the specific adsorption experiments, 5 mg of  $\text{Fe}_3\text{O}_4@\text{COFs}$  was incubated with 1 mL of  
110 peptide mixture containing FGFGF ( $50 \mu\text{g mL}^{-1}$ ) and GGFGG ( $50 \mu\text{g mL}^{-1}$ ), the mixture  
111 containing FGFGF ( $25 \mu\text{g mL}^{-1}$ ), insulin ( $25 \mu\text{g mL}^{-1}$ ) and Lyz ( $25 \mu\text{g mL}^{-1}$ ), and human serum  
112 (diluted by 50-fold) spiked with FGFGF ( $50 \mu\text{g mL}^{-1}$ ) for 5 min. After magnetic separation, the  
113 supernatants were collected. The captured peptides were eluted with eluent (50%water and  
114 50%ACN). The supernatants and the eluates were analyzed by HPLC.

## 115 **6. Digestion of BSA.**

116 1.0 mg BSA in 1.0 mL of 50 mM  $\text{NH}_4\text{HCO}_3$  buffer solution (pH 8.3) was denatured in a  $100^\circ\text{C}$   
117 water bath for 5 min and reduced with dithiothreitol (DTT) (final concentration 5 mM) for 1h at 55  
118  $^\circ\text{C}$ . Then, the reduced products were alkylated by iodoacetic acid (IAA) (final concentration 10  
119 mM) in the dark for 1h at room temperature. Subsequently, digestion was performed by adding  
120 trypsin into the above mixture with a substrate-to-enzyme ratio of 30:1(w/w) at  $37^\circ\text{C}$  for 24h.  
121 Finally, 1% formic acid was used to stop the reaction. The samples were stored at  $-20^\circ\text{C}$  and  
122 further diluted to desired concentration prior to use. Similarly, the digestion of human serum was  
123 also performed by using 1.0 mL human serum (diluted by 60-fold with 50 mM  $\text{NH}_4\text{HCO}_3$  buffer) as  
124 mentioned above.

## 125 **References**

126 [1] J.N. Zheng, Z.A. Lin, G. Lin, H.H. Yang, and L. Zhang, J. Mater. Chem. B, 2015, 3, 2185-2191.  
127 [2] J. Liu, Z.K. Sun, Y.H. Deng, Y. Zou, C.Y. Li, X.H. Guo, L.Q. Xiong, Y. Gao, F.Y. Li, and D.Y.  
128 Zhao, Angew. Chem. Int. Ed. 2009, 48, 5875-5879.

129

130

131

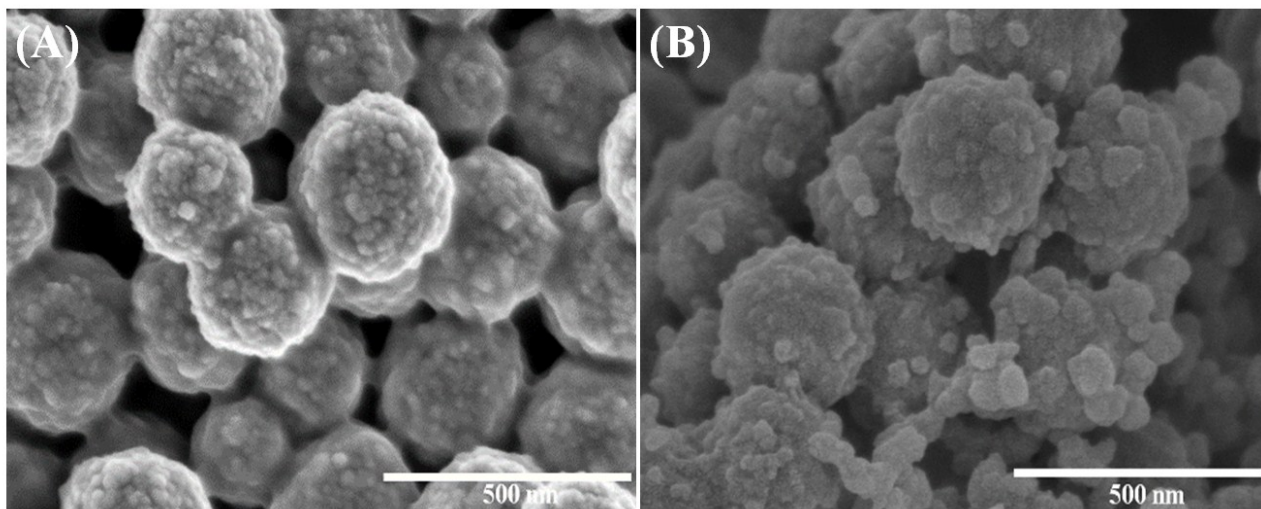

**Fig. S1 SEM images of (A)  $\text{Fe}_3\text{O}_4$  and (B)  $\text{Fe}_3\text{O}_4@\text{COFs}$ .**

149

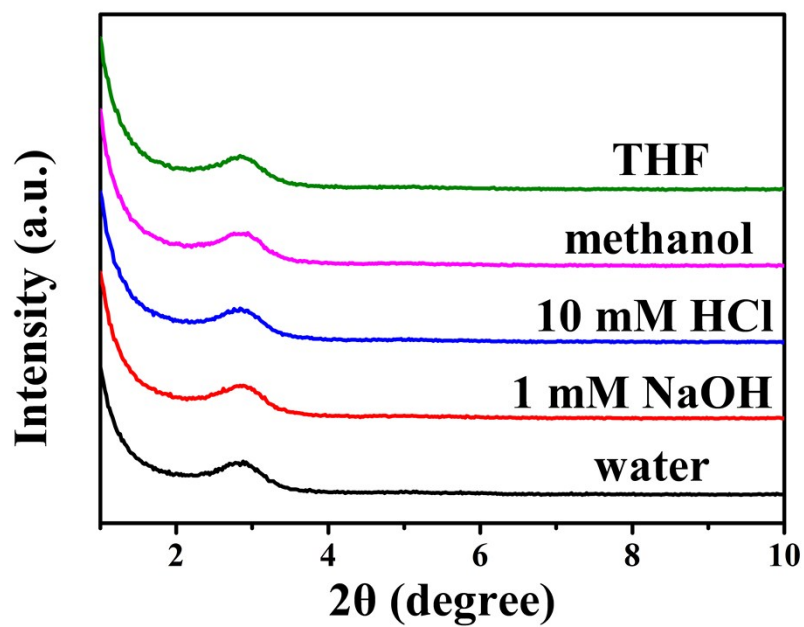

150

151

152

153

154

155

156

157

158

159

160 **Fig.S2 XRD patterns of Fe<sub>3</sub>O<sub>4</sub>@COFs treated with different solvents for overnight**

161

162



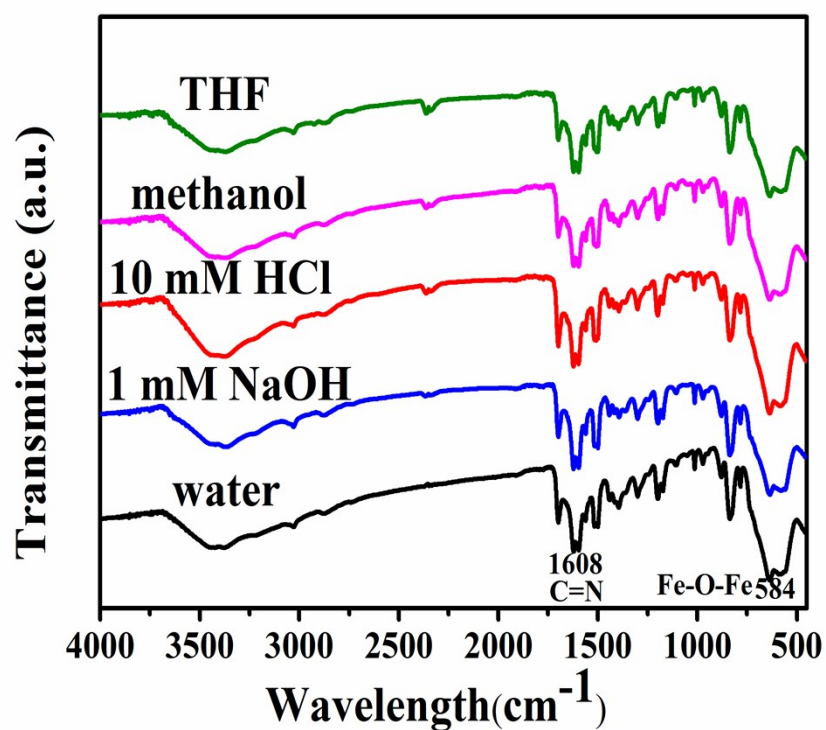

**Fig.S3 FT-IR spectra of Fe<sub>3</sub>O<sub>4</sub>@COFs treated with different solvents for overnight**

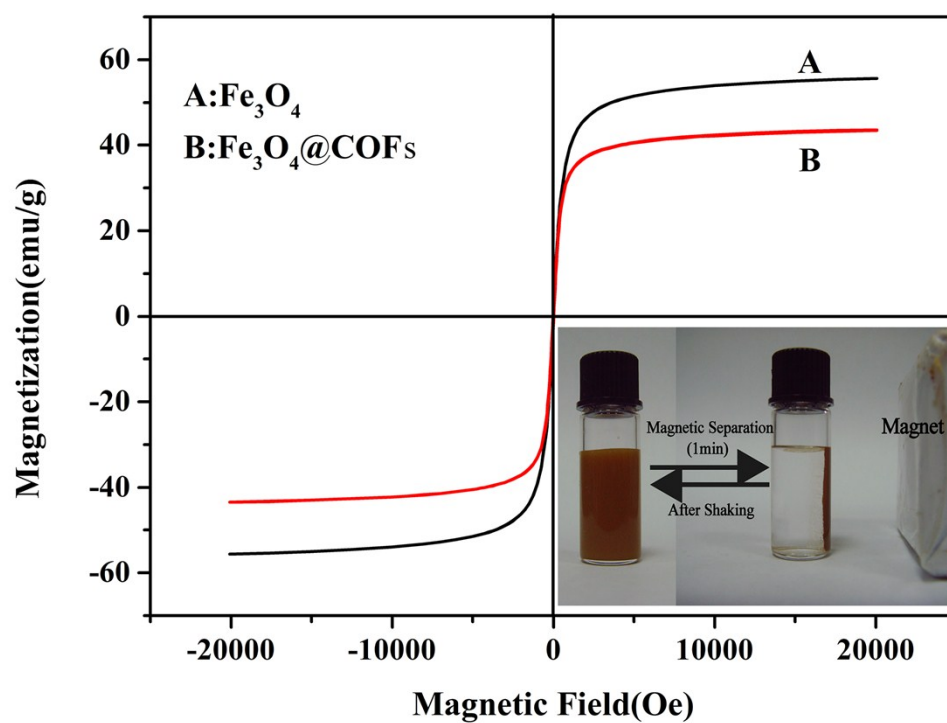

Fig. S4 Hysteresis loops of  $\text{Fe}_3\text{O}_4$  microspheres and  $\text{Fe}_3\text{O}_4@\text{COFs}$  at 300K. The inset shows the magnetic separation behavior of  $\text{Fe}_3\text{O}_4@\text{COFs}$ .

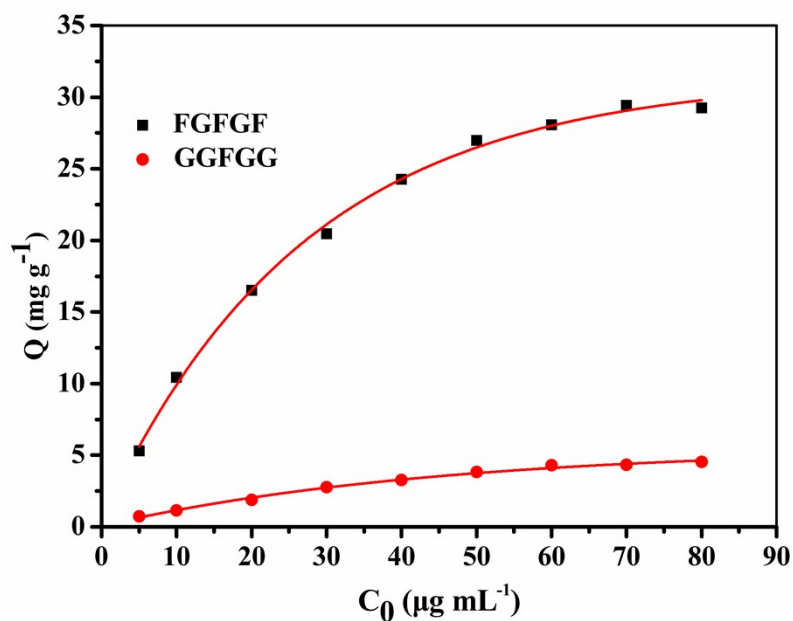

Fig.S5 Adsorption isotherms of the two peptides on the  $\text{Fe}_3\text{O}_4@\text{COFs}$ .

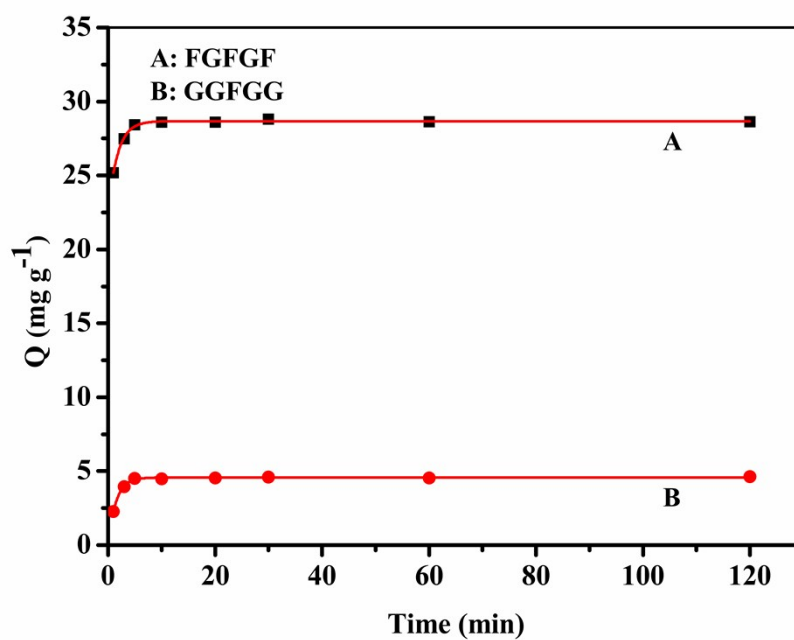

**Fig.S6 Adsorption kinetics of the two peptides on the Fe<sub>3</sub>O<sub>4</sub>@COFs.**

244

245

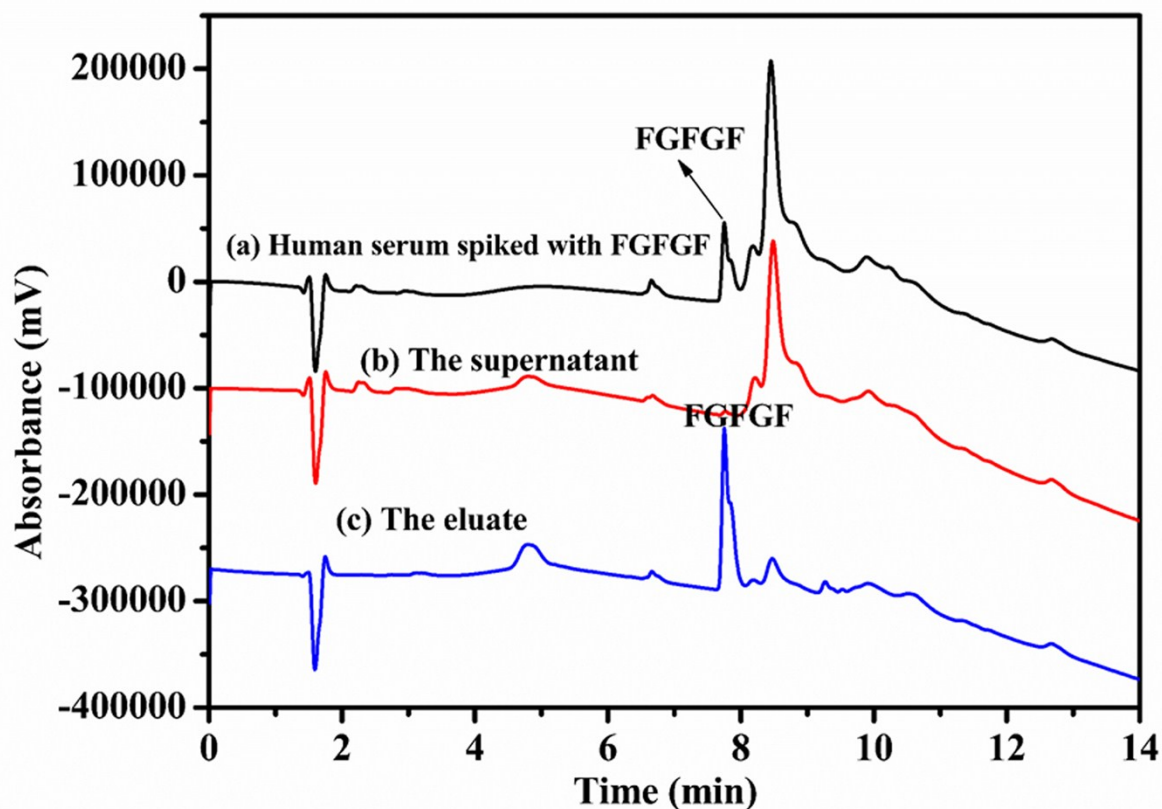

**Fig.S7 Separation of 50-fold diluted human serum spiked with FGFGF before and after treatment with the  $\text{Fe}_3\text{O}_4@\text{COFs}$ .**

Chromatographic conditions:

Buffer A (0.1% TFA aqueous solution) and buffer B (0.08% TFA acetonitrile solution); the flow rate was 1.0 mL/min; column temperature was 40 °C. Column: Venusil XBP C8 (100 mm×4.6 mm, 5 μm, 300 Å). The following gradient program was used: 0–12 min, 13%–90% B; 12–12.5 min, 90% B; 12.5–13 min, 90%–13% B; 14 min, stop. The flow rate of mobile phase: 1 mL/min, Wavelength: 214 nm.

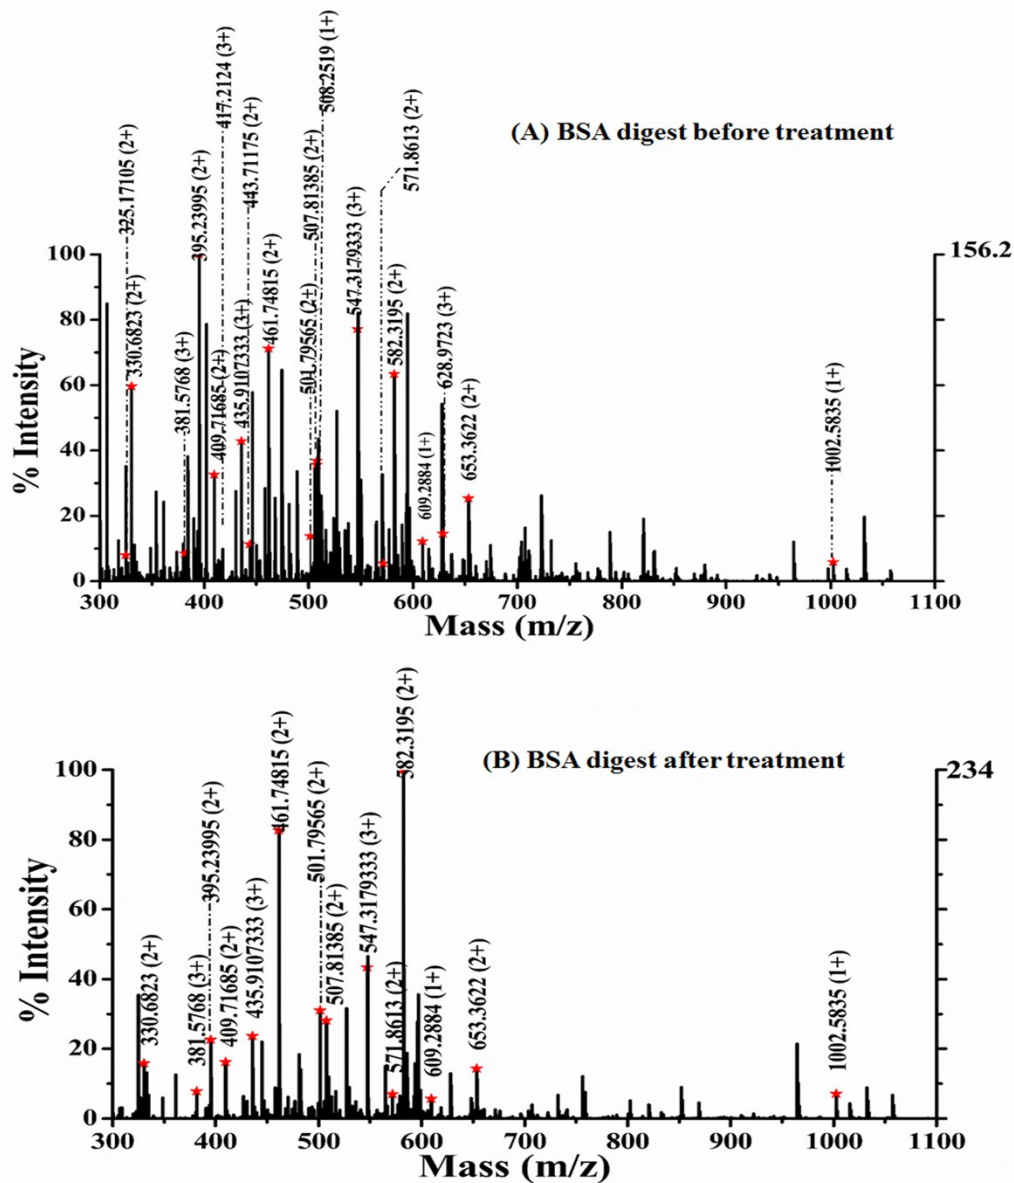

260

261 Fig.S8 HPLC-Q-TOF mass spectra of 5  $\mu\text{g mL}^{-1}$  tryptic BSA digestion. (A) Direct analysis  
 262 and (B) eluate from  $\text{Fe}_3\text{O}_4@\text{COFs}$  after peptide enrichment. Peptide fragments are marked  
 263 with stars.

264

265

266

267

268 **Table S1. Peptides of BSA digest (5  $\mu\text{g mL}^{-1}$ ) identified by HPLC-Q-TOF/MS before and after treatment**  
 269 **with  $\text{Fe}_3\text{O}_4$ @COFs.**

| No | Position | Mw        | Calculated m/z | Amino acid sequence <sup>[a]</sup> | GRA<br>VY | Before<br>enrichment <sup>[b]</sup> | After<br>enrichment |
|----|----------|-----------|----------------|------------------------------------|-----------|-------------------------------------|---------------------|
| 1  | 229-232  | 507.2441  | 508.2519(1+)   | FGER                               | -1.4      | 52.8                                | 0                   |
| 2  | 524-528  | 608.2806  | 609.2884(1+)   | AFDEK                              | -1.26     | 18.3                                | 13.3                |
| 3  | 205-209  | 648.3265  | 325.1711(2+)   | IETMR                              | -0.46     | 15.6                                | 0                   |
| 4  | 490-495  | 659.349   | 330.6823(2+)   | TPVSEK                             | -1.05     | 84.9                                | 37.2                |
| 5  | 257-263  | 788.4643  | 395.2399(2+)   | LVTDLTK                            | 0.43      | 156.2                               | 53.1                |
| 6  | 562-568  | 817.4181  | 409.7168(2+)   | ATEEQLK                            | -1.36     | 46.9                                | 38                  |
| 7  | 131-138  | 885.4079  | 443.7117(2+)   | DDSPDLPK                           | -1.825    | 16.4                                | 0                   |
| 8  | 249-256  | 921.4807  | 461.7481(2+)   | AEFVEVTK                           | 0.175     | 103.5                               | 193.5               |
| 9  | 598-607  | 1001.5757 | 501.7956(2+)   | LVVSTQTALA                         | 1.39      | 25.4                                | 72.5                |
| 10 | 598-607  | 1001.5757 | 1002.5835(1+)  | LVVSTQTALA                         | 1.39      | 9.5                                 | 16.7                |
| 11 | 549-557  | 1013.6121 | 507.8138(2+)   | QTALVELLK                          | 0.64      | 53.2                                | 65.9                |
| 12 | 548-557  | 1141.707  | 381.5768(3+)   | KQTALVELLK                         | 1.09      | 12.3                                | 18.3                |
| 13 | 548-557  | 1141.707  | 571.8613(2+)   | KQTALVELLK                         | 1.09      | 9                                   | 16.5                |
| 14 | 66-75    | 1162.6234 | 582.3195(2+)   | LVNELTEFAK                         | 0.13      | 93.1                                | 234                 |
| 15 | 35-44    | 1248.6138 | 417.2124(3+)   | FKDLGEEHFK                         | -1.25     | 22.5                                | 0                   |
| 16 | 402-412  | 1304.7088 | 435.9107(3+)   | HLVDEPQNLIK                        | -0.58     | 62.1                                | 55.3                |
| 17 | 402-412  | 1304.7088 | 653.3622(2+)   | HLVDEPQNLIK                        | -0.58     | 36.7                                | 33.7                |
| 18 | 437-451  | 1638.9304 | 547.3179(3+)   | KVPQVSTPTLVEVSR                    | -0.067    | 119.6                               | 101.4               |
| 19 | 281-297  | 1883.8935 | 628.9723(3+)   | ADLAKYICDNQDTISSK                  | -0.59     | 21.3                                | 0                   |

270 [a] The red mark in database sequence represents hydrophobic group-containing amino acids;

271 [b] The values refer to the abundant ratios of observed peptides.

272

273

274

275

276

277



Table S2. Peptides of BSA digest (0.5  $\mu\text{g mL}^{-1}$ ) identified by ESI-TOF/MS before and after treatment with  $\text{Fe}_3\text{O}_4@\text{COFs}$ .

| No | Position | Mw        | Calculated m/z | Amino acid sequence[a] | GRAVY  | Before enrichment[b] | After enrichment |
|----|----------|-----------|----------------|------------------------|--------|----------------------|------------------|
| 1  | 490-495  | 659.349   | 330.6823(2+)   | TPVSEK                 | -1.05  | 8.5                  | 9.9              |
| 2  | 257-263  | 788.4643  | 395.2399(2+)   | LVTDLTK                | 0.43   | 12.4                 | 18.2             |
| 3  | 257-263  | 788.4643  | 789.4721(1+)   | LVTDLTK                | 0.43   | 0                    | 1.5              |
| 4  | 562-568  | 817.4181  | 409.7168(2+)   | ATEEQLK                | -1.36  | 6.7                  | 3.2              |
| 5  | 131-138  | 885.4079  | 443.7117(2+)   | DDSPDLPK               | -1.825 | 3.3                  | 0                |
| 6  | 249-256  | 921.4807  | 461.7481(2+)   | AEFVEVTK               | 0.175  | 0                    | 17.8             |
| 7  | 598-607  | 1001.5757 | 501.7956(2+)   | LVVSTQTALA             | 1.39   | 0                    | 2.9              |
| 8  | 549-557  | 1013.6121 | 507.8138(2+)   | QTALVELLK              | 0.64   | 4                    | 19.3             |
| 9  | 548-557  | 1141.707  | 381.5768(3+)   | KQTALVELLK             | 0.19   | 1.5                  | 2.4              |
| 10 | 66-75    | 1162.6234 | 582.3195(2+)   | LVNELTEFAK             | 0.13   | 0.4                  | 10.6             |
| 11 | 402-412  | 1304.7088 | 435.9107(3+)   | HLVDEPQNLIK            | -0.58  | 2.5                  | 0                |

[a] The red mark in database sequence represents hydrophobic group-containing amino acids;

[b] The values refer to the abundant ratios of observed peptides.

296 **Table S3. Serum peptides of human serum digest (5  $\mu\text{g mL}^{-1}$ ) identified by ESI-TOF/MS before and**  
 297 **after treatment with  $\text{Fe}_3\text{O}_4@\text{COFs}$ .**

| Database  |                                   | Before enrichment |               |                                 | After enrichment  |               |                                 |
|-----------|-----------------------------------|-------------------|---------------|---------------------------------|-------------------|---------------|---------------------------------|
| Accession | Protein Name                      | Distinct Peptides | % AA Coverage | Mean Peptide Spectral Intensity | Distinct Peptides | % AA Coverage | Mean Peptide Spectral Intensity |
| P02768    | Serum albumin precursor           | 34                | 58            | 1.09e+005                       | 27                | 35            | 2.3e+005                        |
| P01871    | Ig mu chain C region              | /                 | /             | /                               | 8                 | 18            | 1.66e+004                       |
| P04220    | Ig mu heavy chain disease protein | /                 | /             | /                               | 5                 | 12            | 1.34e+004                       |
| P02647    | Apolipoprotein A-I precursor      | /                 | /             | /                               | 6                 | 25            | 3.21e+004                       |
| P01857    | Ig gamma-1 chain C region         | 6                 | 21            | 5.86e+004                       | 5                 | 15            | 1.24e+005                       |
| P01859    | Ig gamma-2 chain C region         | 5                 | 15            | 3.28e+004                       | 5                 | 15            | 6.62e+004                       |
| P01861    | Ig gamma-4 chain C region         | 4                 | 13            | 3.85e+004                       | 4                 | 13            | 7.52e+004                       |
| P01860    | Ig gamma-3 chain C region         | 3                 | 8             | 4.30e+004                       | 3                 | 8             | 9.92e+004                       |
| P02647    | Ig lambda chain C regions         | 3                 | 12            | 1.21e+004                       | 6                 | 18            | 2.61e+004                       |
| P01842    | Ig kappa chain C region           | 2                 | 23            | 2.20e+004                       | 5                 | 24            | 3.60e+004                       |
| P01876    | Ig alpha-1 chain C region         | /                 | /             | /                               | 3                 | 7             | 2.43e+004                       |
| P01877    | Ig alpha-2 chain C region         | /                 | /             | /                               | 2                 | 5             | 2.05e+004                       |
| P01023    | Alpha-2-macroglobulin precursor   | /                 | /             | /                               | 2                 | 1             | 9.05e+003                       |

298
